# Supplementary material for: Integrating ANFIS and Qt Framework to Develop a Mobile‐Based Typhoon Rainfall Forecasting System
Source: Hindawi journal article supplement (doi:10.1155/2022/5248308), 2022-01-01
Supplement: f1 [file 5248308.f1.docx]

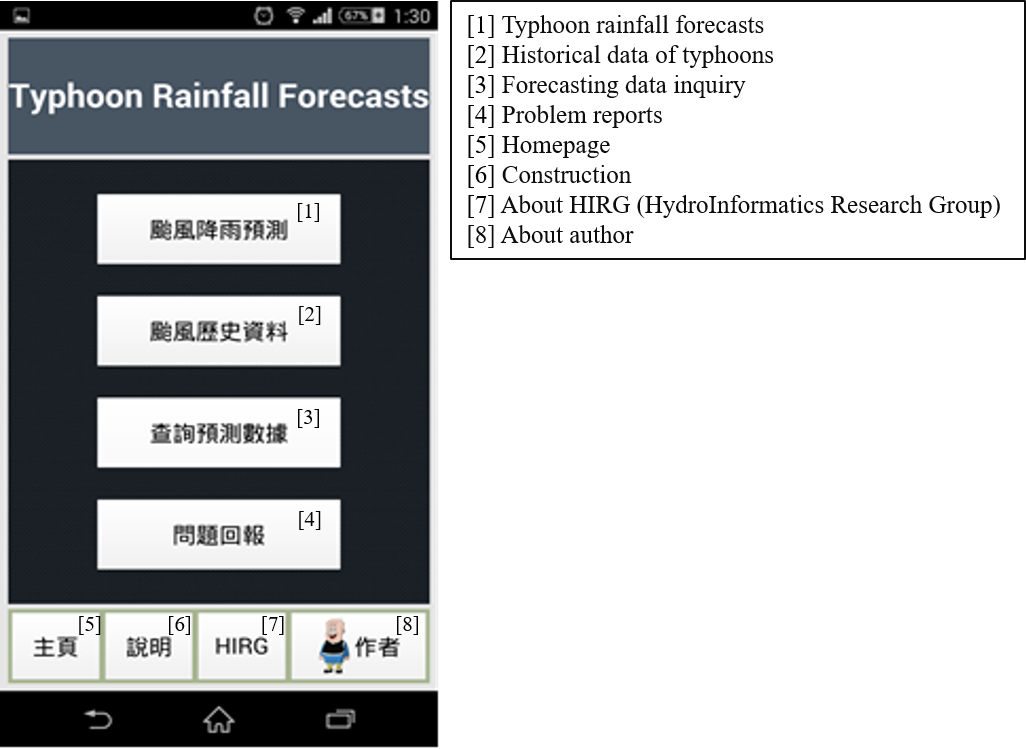


**Figure S1. TRF App Homepage Interface**

**
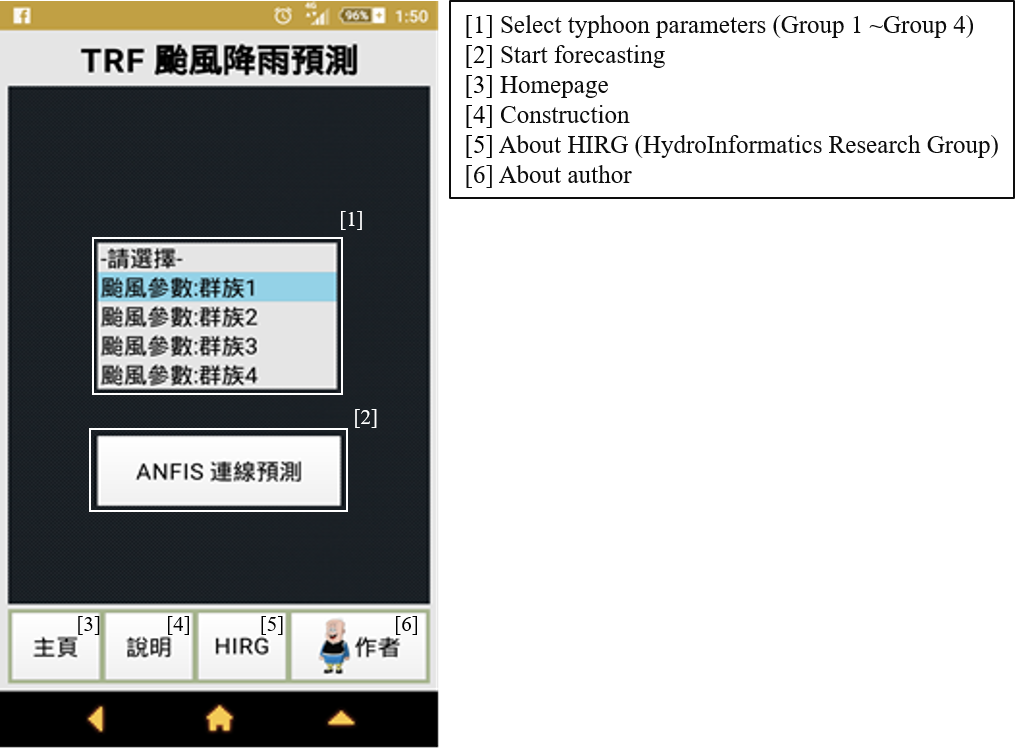
**

**Figure S2. Select optimal typhoon parameters mode**

**
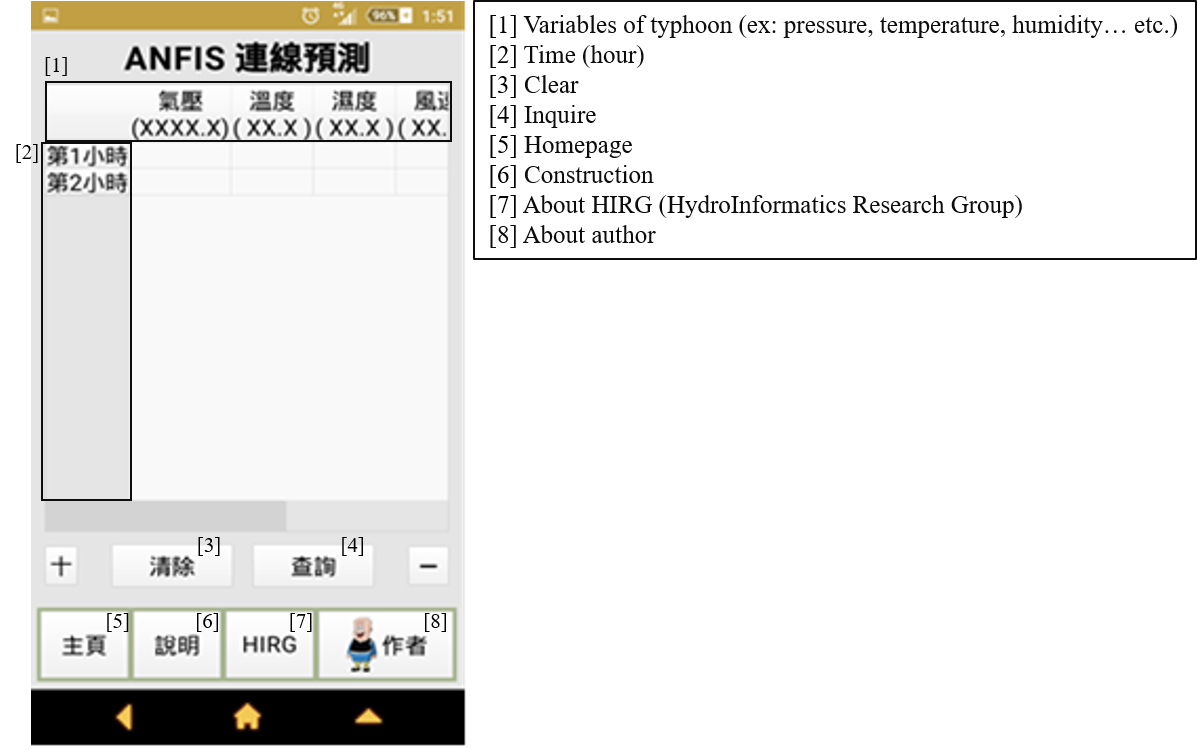
**

**Figure S3. Input optimal typhoon variables manully**


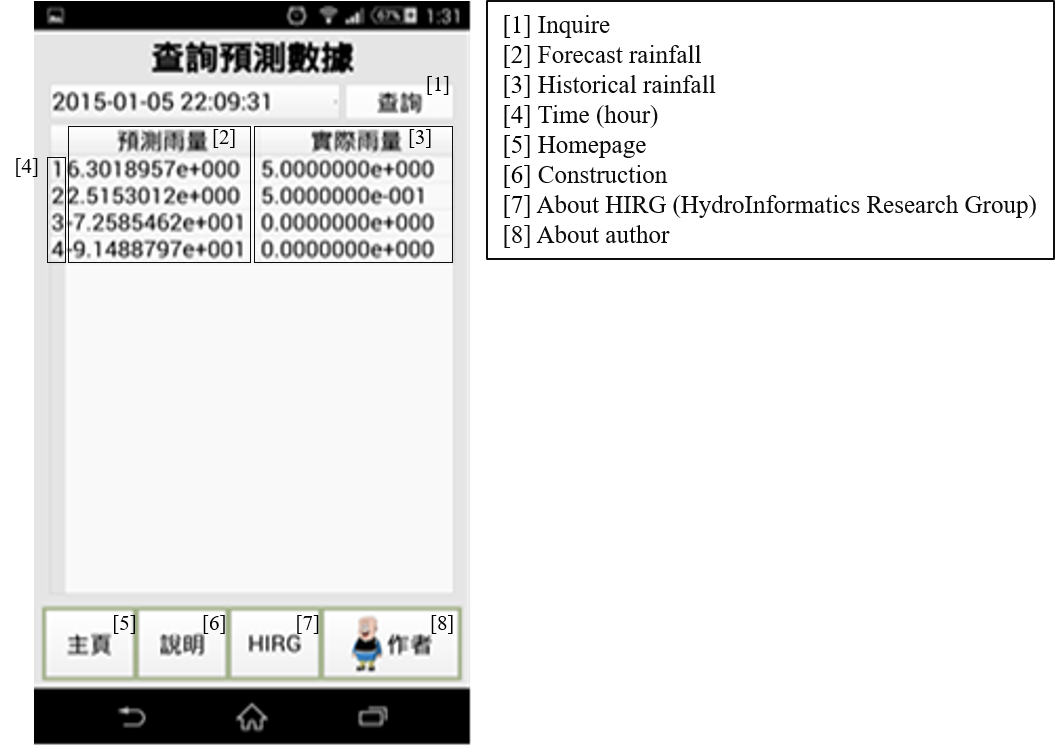


**Figure S4. Forecast result of typhoon rainfall**


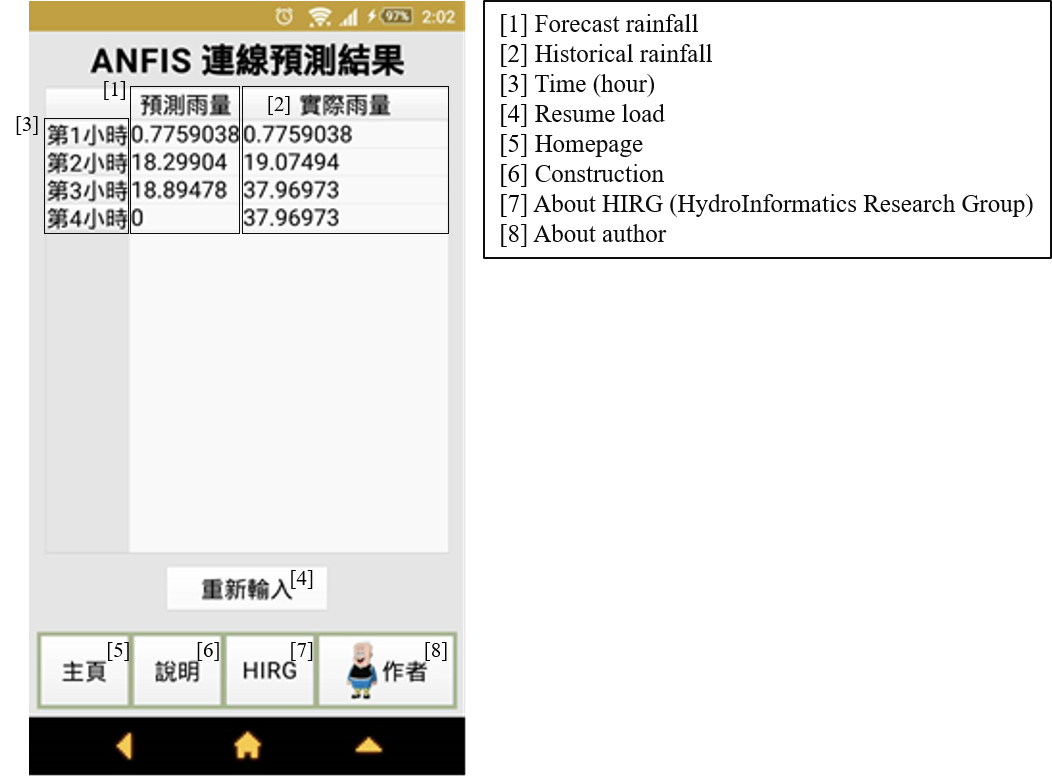


**Figure S5. Forecast result output**
